# Supplementary material for: Correlation Models between Environmental Factors and Bacterial Resistance to Antimony and Copper
Source: PubMed Central journal article supplement (PMC3812145; doi:10.1371/journal.pone.0078533), 2013-10-29
Supplement: pone.0078533.s001.pdf [file pone.0078533.s001.pdf]

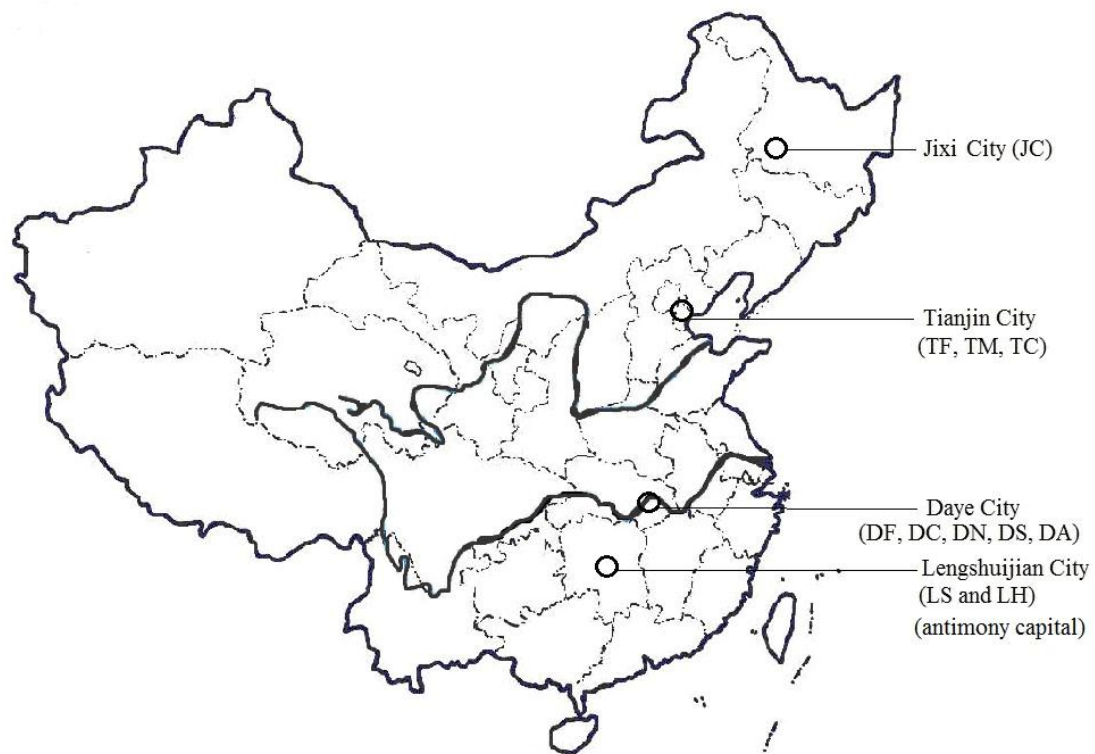

Figure S1

**Figure S1.** A map showing the location of the 11 soil sampling sites in the P. R. of China. These sites include: the Lengshuijiang Sb mine (subsurface soil) (LS) (27°45' N, 111°28'), the Lengshuijiang high Sb content mine (LH) (27°45' N, 111°28'), the Jixi coal mine (JC) (45°18' N, 130°57' E), the Daye iron mine (DF) (30°12' N, 114°56' E), the Daye Tonglvshan copper mine (DC) (30°04' N, 115°01' E), Daye tin soil (DN) (30°00' N, 115°01' E), Daye delafossite with high sulfur content (DS) (29°59' N, 114°57' E), the Daye gold mine (DA) (30°03' N, 114°59' E), and the Tianjin iron mine (TF), manganese mine (TM) and coal mine (TC) (39°01' N, 117°11' E).
