# Supplementary material for: Correlation Models between Environmental Factors and Bacterial Resistance to Antimony and Copper
Source: PubMed Central journal article supplement (PMC3812145; doi:10.1371/journal.pone.0078533), 2013-10-29
Supplement: pone.0078533.s002.pdf [file pone.0078533.s002.pdf]

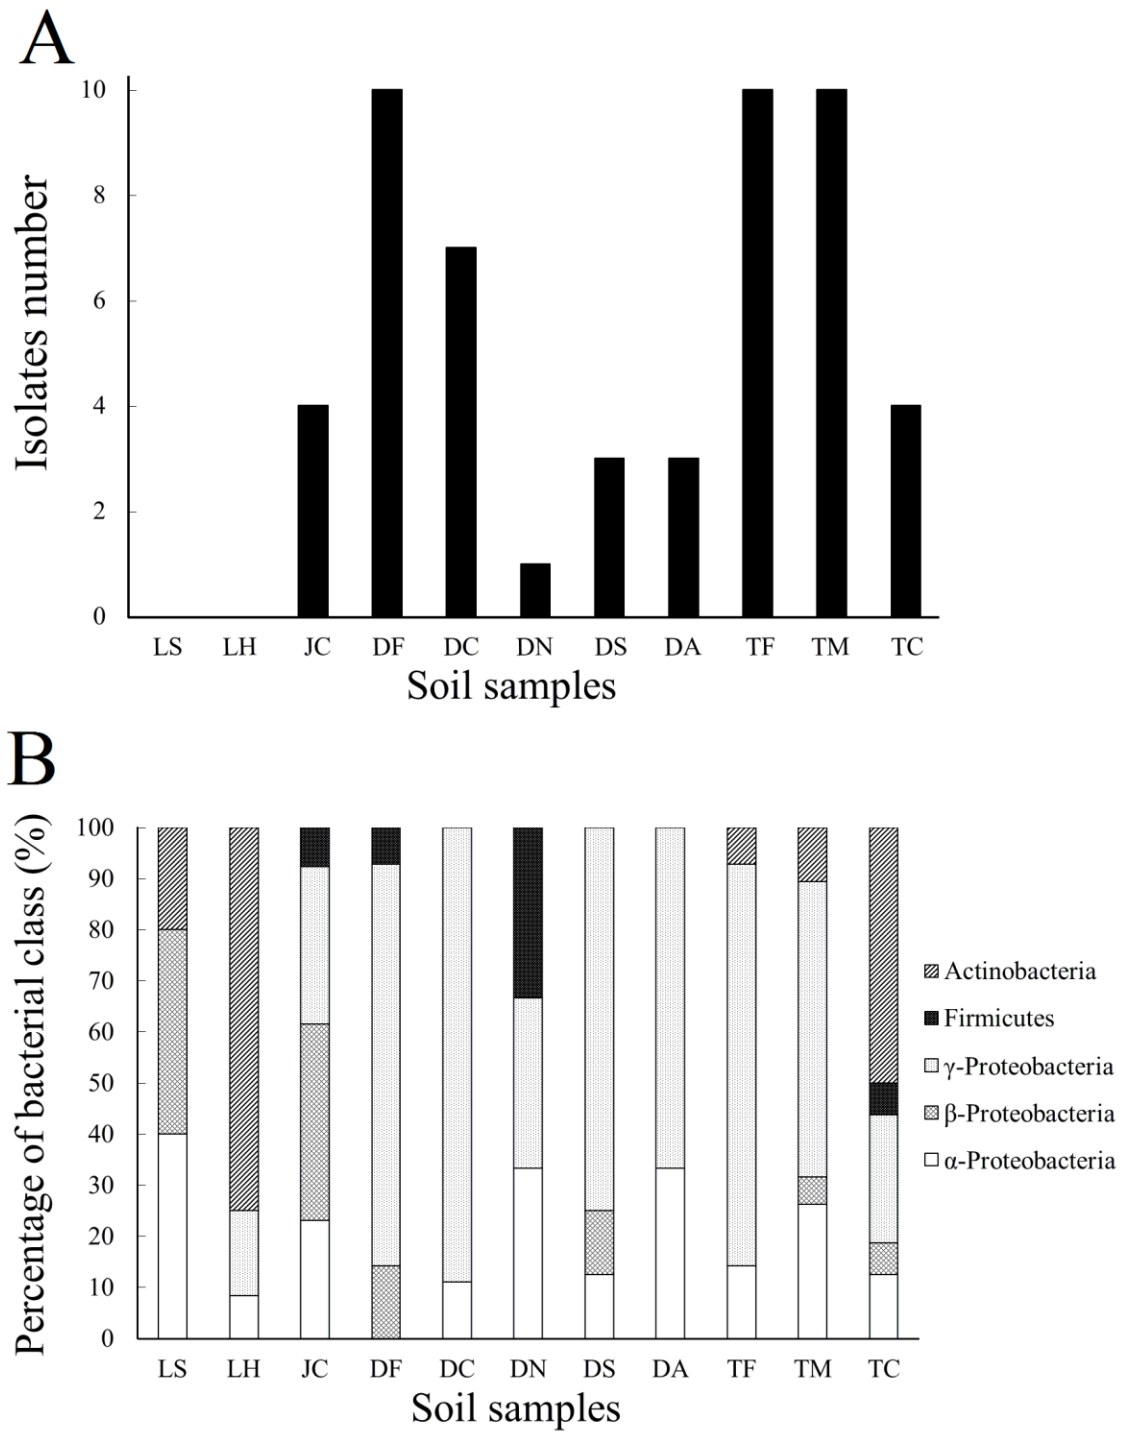

Figure S2

**Figure S2** (A). Distribution of the isolats of the 52 *Pseudomonas* strains among the 11 soil samples (Figure S1). (B). The percentage of the bacterial classes among the 11 soil samples.
