# Supplementary material for: Correlation Models between Environmental Factors and Bacterial Resistance to Antimony and Copper
Source: PubMed Central journal article supplement (PMC3812145; doi:10.1371/journal.pone.0078533), 2013-10-29
Supplement: pone.0078533.s003.pdf [file pone.0078533.s003.pdf]

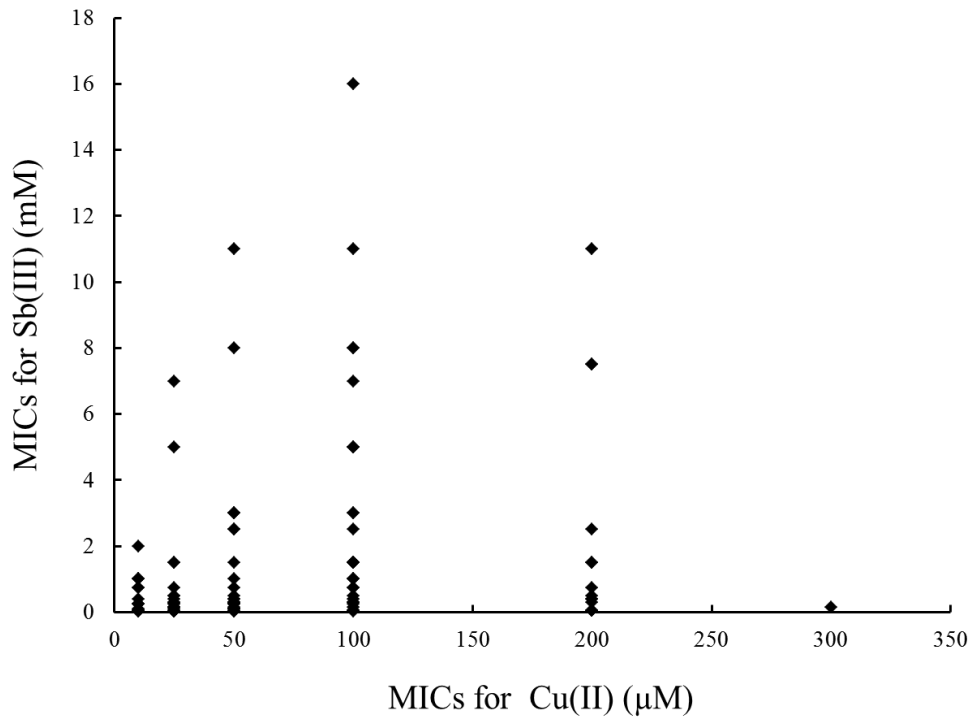

Figure S3

**Figure S3.** The unimodal scatter diagram determined using Excel program showing the correlation between the MICs for Sb(III) and for Cu(II) of the 125 Sb(III)-resistant bacterial strains.
