# Supplementary material for: Correlation Models between Environmental Factors and Bacterial Resistance to Antimony and Copper
Source: PubMed Central journal article supplement (PMC3812145; doi:10.1371/journal.pone.0078533), 2013-10-29
Supplement: pone.0078533.s004.pdf [file pone.0078533.s004.pdf]

Table S1 Experimental conditions for HPLC-HG-AFS analysis

| HPLC                      |                                                                                    |
|---------------------------|------------------------------------------------------------------------------------|
| Column                    | Hamilton PRP-X100 (250 mm×4.1 mm i.d.,10 μm )                                      |
| Mobile phase              | 15 mmol L <sup>-1</sup> (NH <sub>4</sub> ) <sub>2</sub> HPO <sub>4</sub> (pH 6.0 ) |
| Flow rate of mobile phase | 1.0 mL min <sup>-1</sup>                                                           |
| Injection volume          | 100 μL                                                                             |

  

| HG               |                                 |         |
|------------------|---------------------------------|---------|
| KBH <sub>4</sub> | 1.5% KBH <sub>4</sub> +0.5% KOH | 6ml/min |
| HCl              | 7%                              | 6ml/min |

  

| AFS             |                                       |
|-----------------|---------------------------------------|
| Lamp            | Hollow cathode arsenic lamp, 193.7 nm |
| PMT voltage     | 280 V                                 |
| Primary current | 90 mA                                 |
| Carrier gas     | Argon, 600 mL min <sup>-1</sup>       |
