# Supplementary material for: Correlation Models between Environmental Factors and Bacterial Resistance to Antimony and Copper
Source: PubMed Central journal article supplement (PMC3812145; doi:10.1371/journal.pone.0078533), 2013-10-29
Supplement: pone.0078533.s005.pdf [file pone.0078533.s005.pdf]

Table S2 The MIC for Sb(III) and Cu(II) of each bacterial strains isolated from the 11 soil samples\*

| Strains | Soil | MIC for Sb(III)   | MIC for Cu(II)    | Strains | Soil | MIC for Sb(III)   | MIC for Cu(II)    |
|---------|------|-------------------|-------------------|---------|------|-------------------|-------------------|
|         |      | ( $\mu\text{M}$ ) | ( $\mu\text{M}$ ) |         |      | ( $\mu\text{M}$ ) | ( $\mu\text{M}$ ) |
| LS1     | LS   | 150               | 25                | DS3     | DS   | 1500              | 200               |
| LS2     | LS   | 150               | 25                | DS4     | DS   | 7500              | 200               |
| LS3     | LS   | 300               | 50                | DS5     | DS   | 150               | 100               |
| LS4     | LS   | 1000              | 50                | DS6     | DS   | 1500              | 200               |
| LS5     | LS   | 300               | 200               | DS7     | DS   | 7500              | 200               |
| LS6     | LS   | 100               | 50                | DS8     | DS   | 50                | 200               |
| LS7     | LS   | 100               | 50                | DA1     | DA   | 500               | 100               |
| LS8     | LS   | 300               | 50                | DA2     | DA   | 1500              | 100               |
| LS9     | LS   | 100               | 50                | DA3     | DA   | 250               | 50                |
| LS10    | LS   | 100               | 50                | DA4     | DA   | 750               | 100               |
| LH1     | LH   | 3000              | 100               | DA5     | DA   | 1500              | 25                |
| LH2     | LH   | 11000             | 100               | DA6     | DA   | 50                | 100               |
| LH3     | LH   | 11000             | 200               | TF1     | TF   | 750               | 200               |
| LH4     | LH   | 2500              | 200               | TF2     | TF   | 300               | 25                |
| LH5     | LH   | 11000             | 50                | TF3     | TF   | 250               | 10                |
| LH6     | LH   | 3000              | 50                | TF4     | TF   | 750               | 10                |
| LH7     | LH   | 2500              | 50                | TF5     | TF   | 400               | 200               |
| LH8     | LH   | 2500              | 50                | TF6     | TF   | 50                | 200               |
| LH9     | LH   | 3000              | 100               | TF7     | TF   | 250               | 10                |
| LH10    | LH   | 2500              | 100               | TF8     | TF   | 500               | 25                |
| LH11    | LH   | 16000             | 100               | TF9     | TF   | 300               | 100               |
| LH12    | LH   | 3000              | 50                | TF10    | TF   | 50                | 100               |
| JC1     | JC   | 100               | 50                | TF11    | TF   | 50                | 10                |
| JC2     | JC   | 300               | 50                | TF12    | TF   | 750               | 10                |
| JC3     | JC   | 25                | 50                | TF13    | TF   | 1000              | 10                |
| JC4     | JC   | 100               | 50                | TF14    | TF   | 5000              | 100               |
| JC5     | JC   | 2000              | 10                | TF15    | TF   | 50                | 10                |
| JC6     | JC   | 100               | 10                | TM1     | TM   | 5000              | 100               |
| JC7     | JC   | 8000              | 50                | TM2     | TM   | 100               | 50                |
| JC8     | JC   | 300               | 100               | TM3     | TM   | 1000              | 10                |
| JC9     | JC   | 400               | 100               | TM4     | TM   | 400               | 25                |
| JC10    | JC   | 750               | 50                | TM5     | TM   | 1000              | 10                |
| JC11    | JC   | 1500              | 100               | TM6     | TM   | 750               | 100               |
| JC12    | JC   | 300               | 100               | TM7     | TM   | 400               | 50                |
| JC13    | JC   | 400               | 200               | TM8     | TM   | 100               | 50                |
| DF1     | DF   | 1000              | 100               | TM9     | TM   | 25                | 50                |
| DF2     | DF   | 1000              | 100               | TM10    | TM   | 250               | 50                |
| DF3     | DF   | 100               | 50                | TM11    | TM   | 250               | 50                |
| DF4     | DF   | 1500              | 100               | TM12    | TM   | 500               | 25                |
| DF5     | DF   | 150               | 50                | TM13    | TM   | 250               | 25                |

|      |    |      |     |      |    |      |     |
|------|----|------|-----|------|----|------|-----|
| DF6  | DF | 1500 | 50  | TM14 | TM | 750  | 25  |
| DF7  | DF | 400  | 50  | TM15 | TM | 400  | 10  |
| DF8  | DF | 300  | 50  | TM16 | TM | 5000 | 25  |
| DF9  | DF | 1500 | 100 | TM17 | TM | 250  | 10  |
| DF10 | DF | 8000 | 100 | TM18 | TM | 25   | 25  |
| DF11 | DF | 8000 | 100 | TM19 | TM | 50   | 50  |
| DF12 | DF | 1500 | 100 | TC1  | TC | 25   | 10  |
| DF13 | DF | 50   | 100 | TC2  | TC | 50   | 25  |
| DF14 | DF | 50   | 10  | TC3  | TC | 25   | 10  |
| DC1  | DC | 1500 | 100 | TC4  | TC | 25   | 25  |
| DC2  | DC | 50   | 100 | TC5  | TC | 25   | 25  |
| DC3  | DC | 1500 | 100 | TC6  | TC | 25   | 25  |
| DC4  | DC | 1500 | 25  | TC7  | TC | 25   | 100 |
| DC5  | DC | 100  | 25  | TC8  | TC | 150  | 25  |
| DC6  | DC | 250  | 50  | TC9  | TC | 500  | 50  |
| DC7  | DC | 7000 | 100 | TC10 | TC | 3000 | 50  |
| DC8  | DC | 7000 | 25  | TC11 | TC | 150  | 300 |
| DC9  | DC | 300  | 25  | TC12 | TC | 150  | 25  |
| DN1  | DN | 50   | 200 | TC13 | TC | 250  | 10  |
| DN2  | DN | 1500 | 100 | TC14 | TC | 250  | 100 |
| DN3  | DN | 5000 | 100 | TC15 | TC | 50   | 10  |
| DS1  | DS | 1000 | 100 | TC16 | TC | 250  | 25  |
| DS2  | DS | 500  | 200 |      |    |      |     |

---

\*The soil names are listed in Fig. S1
